# Supplementary material for: Capillary droplet propulsion on a fibre
Source: Royal Society of Chemistry journal article supplement (doi:10.1039/c5sm01228g), 2015-01-01
Supplement: c5sm01228g1.pdf [file c5sm01228g1.pdf]

## Capillary Droplet Propulsion on a Fibre (Supplementary Information)

Sabrina Haefner,<sup>1</sup> Oliver Bäumchen,<sup>2</sup> and Karin Jacobs<sup>1</sup>

<sup>1</sup>*Saarland University, Department of Experimental Physics, D-66041 Saarbrücken, Germany*

<sup>2</sup>*Max Planck Institute for Dynamics and Self-Organization (MPIDS), 37077 Göttingen, Germany*

### A. Video Captions

**Video V1.** Bright field optical microscopy video showing the dewetting process of a polystyrene droplet with a molecular weight of  $M_w = 35$  kg/mol on a hydrophobized fibre at a temperature of  $T = 180$  °C.
